# Supplementary material for: Tuning the properties of pH responsive nanoparticles to control cellular interactions in vitro and ex vivo
Source: Royal Society of Chemistry journal article supplement (doi:10.1039/c6py01332e), 2016-01-01
Supplement: c6py01332e1.pdf [file c6py01332e1.pdf]

Supplementary information for:

## **Tuning the properties of pH responsive Nanoparticles to control cellular interactions in vitro and ex vivo**

S. K. Mann<sup>ab</sup>, A. Dufour<sup>a</sup>, J. J. Glass<sup>cd</sup>, R. De Rose<sup>cd</sup>, S. J. Kent<sup>cd</sup>, G. K. Such<sup>b</sup> and A. P. R. Johnston<sup>\*ae</sup>

<sup>a</sup>Drug Delivery, Disposition and Dynamics, Monash Institute of Pharmaceutical Sciences, Monash University, Parkville, Victoria 3052, Australia. Email: angus.johnston@monash.edu

<sup>b</sup>Department of Chemistry, The University of Melbourne, Parkville, Victoria 3010, Australia.

<sup>c</sup>Department of Microbiology and Immunology, The Peter Doherty Institute for Infection and Immunity, The University of Melbourne, VIC 3000, Australia

<sup>d</sup>ARC Centre of Excellence in Convergent Bio-Nano Science and Technology, The University of Melbourne, Melbourne, VIC 3010, Australia.

<sup>e</sup>ARC Centre of Excellence in Convergent Bio-Nano Science and Technology, Monash University, Parkville, Australia

### **Synthesis of pentafluorophenyl methacrylate**

Pentafluorophenol (5.0 g, 2.7 mmol), triethylamine (4.1 g, 41 mmol) and 4-dimethylaminopyridine (0.67 g, 27 mmol) were dissolved in dry DCM (30 ml). Nitrogen was bubbled through the solution for 5 min at 0°C. Methacrylic anhydride (6.1 ml, 41 mmol) was added slowly via a syringe with vigorous stirring. The resulting solution was stirred at room temperature for 12 h under a nitrogen atmosphere. The solution was diluted with DCM (20 ml) and washed with 0.1 M HCl (50 mL), water (50 mL) and brine (50 mL). The organic layer was dried over MgSO<sub>4</sub>, filtered and concentrated *in vacuo*. The crude product was purified by automated column chromatography with a gradient of *n*-hexane and ethyl acetate to give pentafluorophenyl methacrylate as a colourless liquid (4.2 g, 61%). <sup>1</sup>H NMR (400 MHz; CDCl<sub>3</sub>): δ/ppm: 6.45 (quintet, J = 1 Hz), 5.91 (qd, J = 1.6, 1.3 Hz), 2.09 (dd, J = 1.6, 1.0 Hz); <sup>19</sup>F NMR (376 MHz; CDCl<sub>3</sub>): δ/ppm: -152.77 (d, 2F, J = 16 Hz, *ortho*), -158.17 (1F, t, J = 22 Hz, *para*), -162.46 (2F, dd, J = 16, 22 Hz, *meta*).

**Table S1.** Polymer synthesis

| Polymer                                      | Monomer:CTA:AIBN | Time (h) |
|----------------------------------------------|------------------|----------|
| PEGMA <sub>8</sub>                           | 28:1:0.1         | 16       |
| PEGMA <sub>37</sub>                          | 176:1:0.1        | 16       |
| PEG <sub>45</sub> -b-PDEAEMA <sub>97</sub>   | 100:1:0.1        | 15       |
| PEGMA <sub>8</sub> -b-PDEAEMA <sub>100</sub> | 110:1:0.1        | 18       |
| PEGMA <sub>37</sub> -b-PDEAEMA <sub>90</sub> | 110:1:0.1        | 16       |
| PDEAEMA                                      | 500:10:1         | 16       |
| PDEAEMA-r-PPFPMA                             | 500:10:1         | 16       |

\*All polymers were synthesized in 1,4-Dioxane at 60°C.

**Table S2.** Polymer characterization

| Polymer                                      | PEG/PEGMA<br>Mn (NMR) | PDEAEMA<br>Mn (NMR) | Mn<br>(GPC) | Mw<br>(GPC) | PDI  |
|----------------------------------------------|-----------------------|---------------------|-------------|-------------|------|
| PEG <sub>45</sub> -b-PDEAEMA <sub>97</sub>   | 2,000                 | 17,700              | 16,962      | 19,086      | 1.13 |
| PEGMA <sub>8</sub> -b-PDEAEMA <sub>100</sub> | 2,400                 | 18,200              | 16,818      | 21,847      | 1.30 |
| PEGMA <sub>37</sub> -b-PDEAEMA <sub>90</sub> | 11,100                | 16,700              | 55,151      | 90,038      | 1.63 |
| PDEAEMA                                      | -                     | 36,000              | -           | -           | -    |
| PDEAEMA-r-PPFPMA                             | -                     | 49,000              | 27,940      | 42,540      | 1.52 |

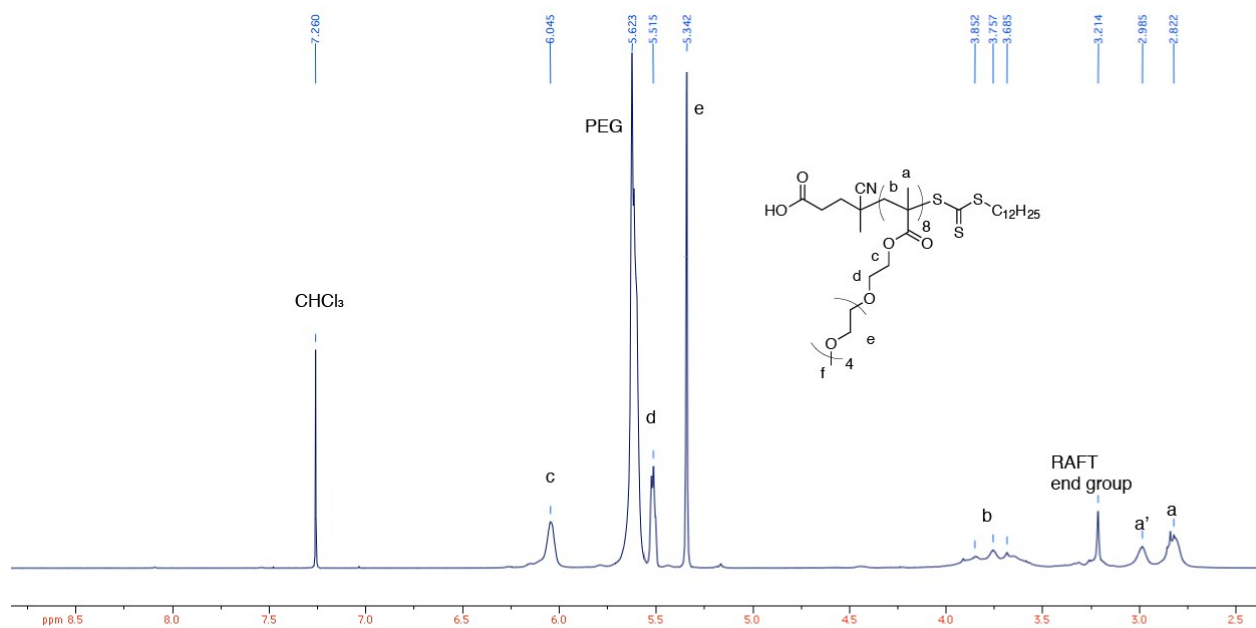

**Figure S1.**  $^1\text{H}$  NMR of PEGMA<sub>8</sub> macro RAFT agent ( $\text{CDCl}_3$ ).

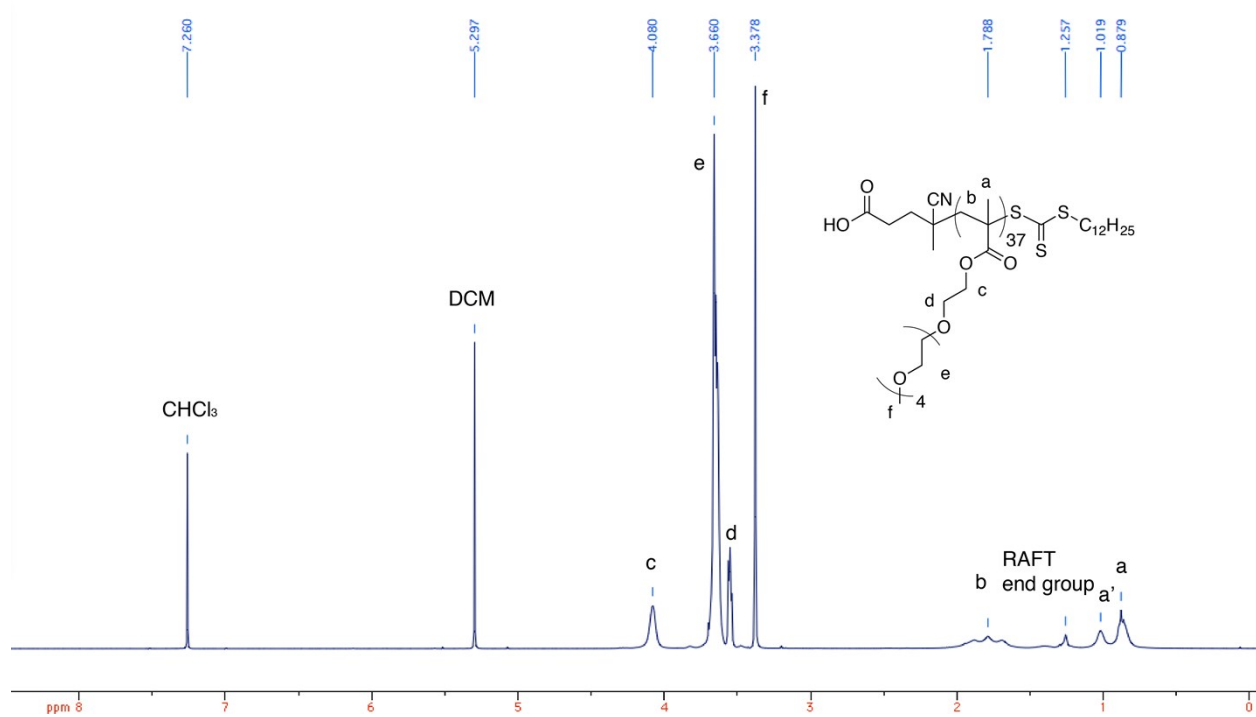

**Figure S2.**  $^1\text{H}$  NMR of PEGMA<sub>37</sub> macro RAFT agent ( $\text{CDCl}_3$ ).

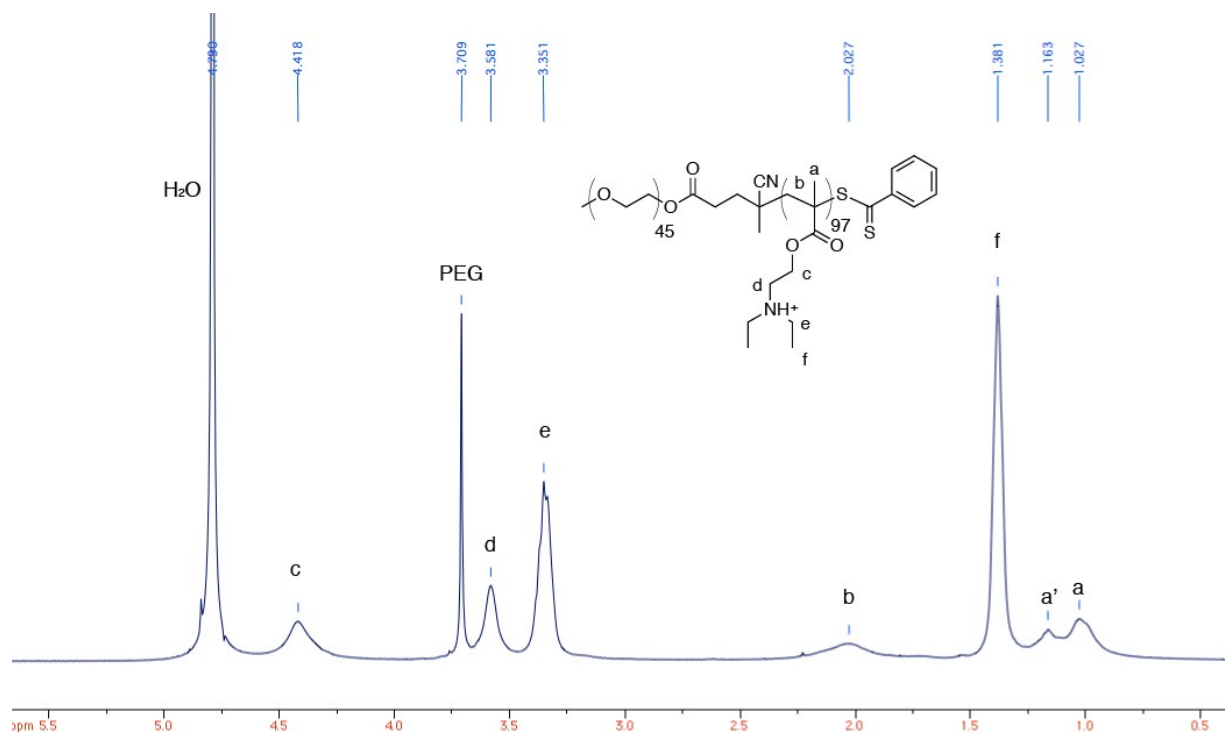

**Figure S3.**  $^1\text{H}$  NMR of  $\text{PEG}_{45}\text{-b-PDEAEMA}_{97}$  ( $\text{D}_2\text{O}$ ).

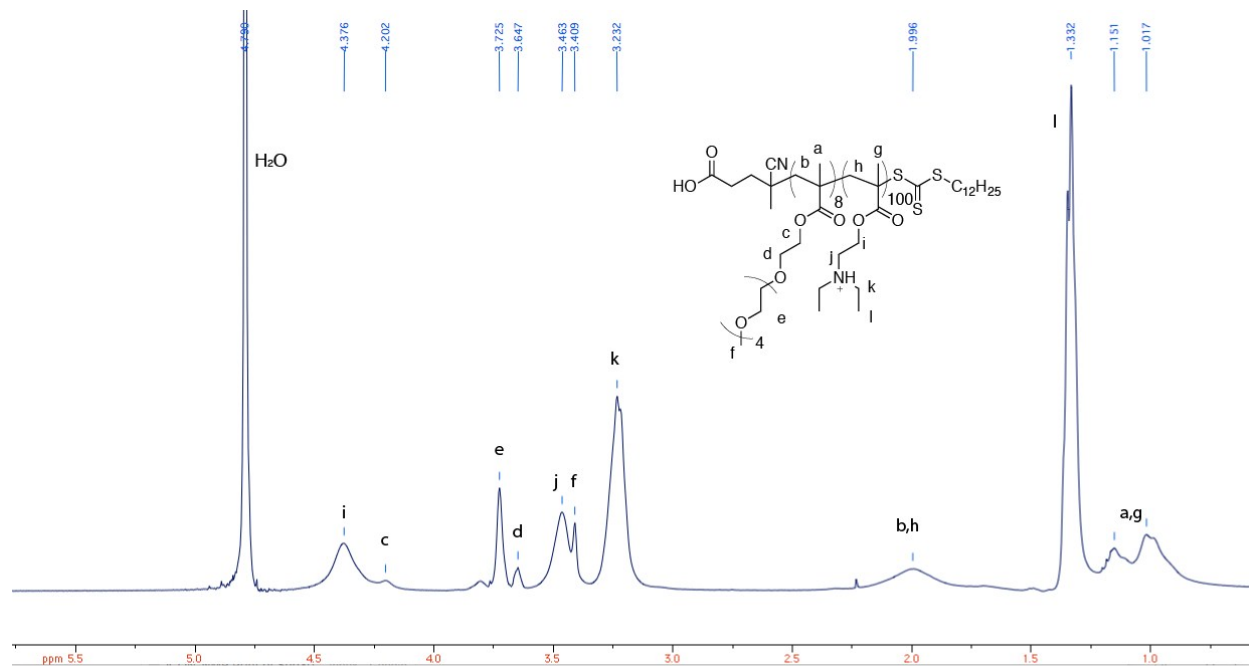

**Figure S4.**  $^1\text{H}$  NMR of  $\text{PEGMA}_8\text{-b-PDEAEMA}_{100}$  ( $\text{D}_2\text{O}$ ).

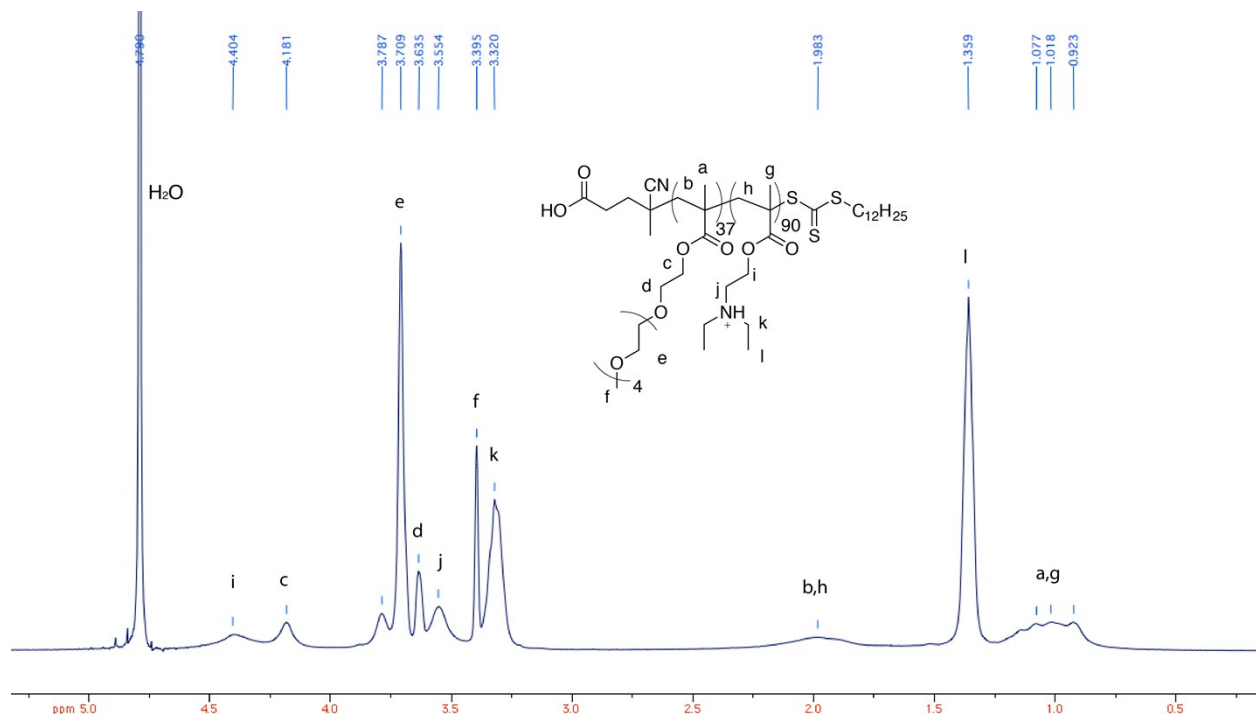

Figure S5.  $^1\text{H}$  NMR of PEGMA<sub>37</sub>-b-PDEAEMA<sub>90</sub> (D<sub>2</sub>O)

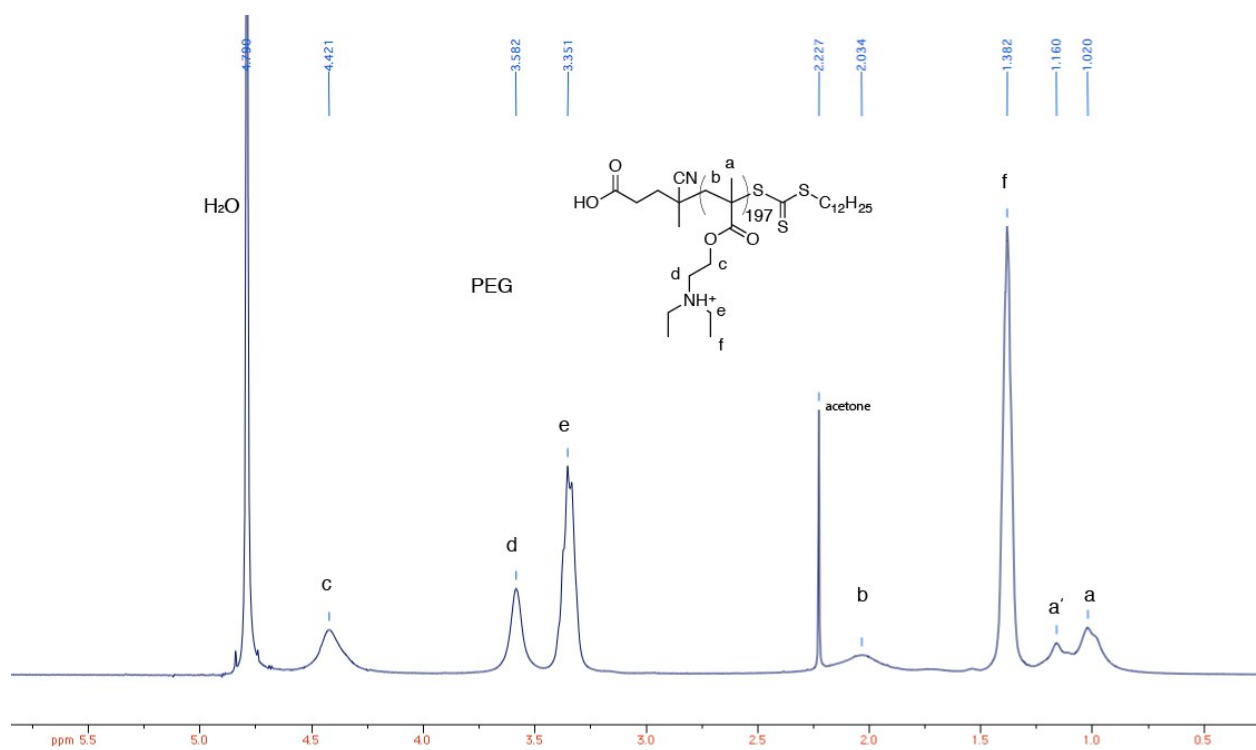

Figure S6.  $^1\text{H}$  NMR of PDEAEMA (D<sub>2</sub>O).

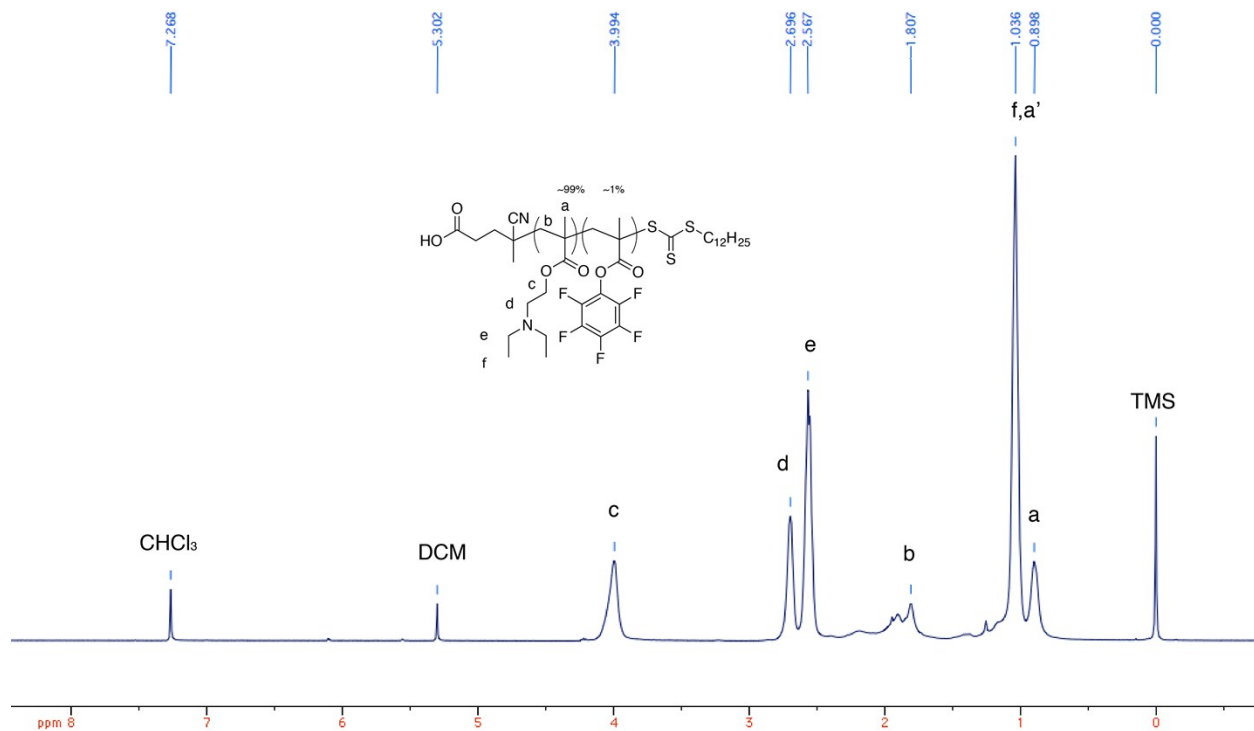

**Figure S7.**  $^1\text{H}$  NMR of P(PDEAEMA-*r*-PFPMA) ( $\text{CDCl}_3$ ).

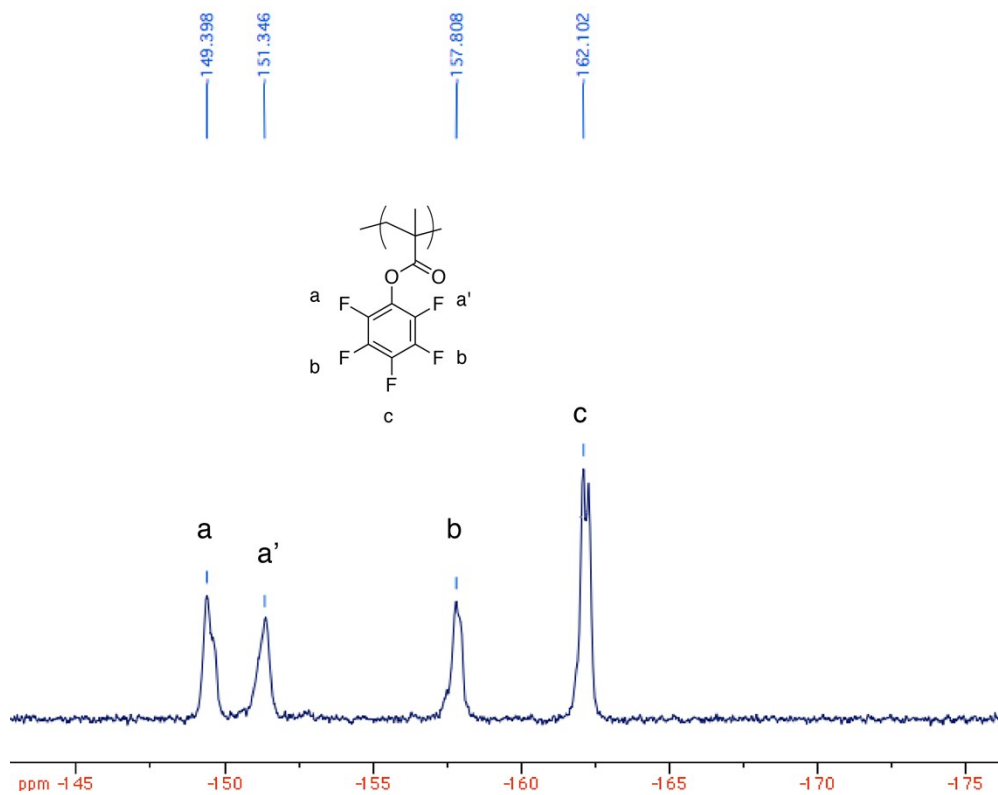

**Figure S8.**  $^{19}\text{F}$  NMR of P(PDEAEMA-*r*-PFPMA).

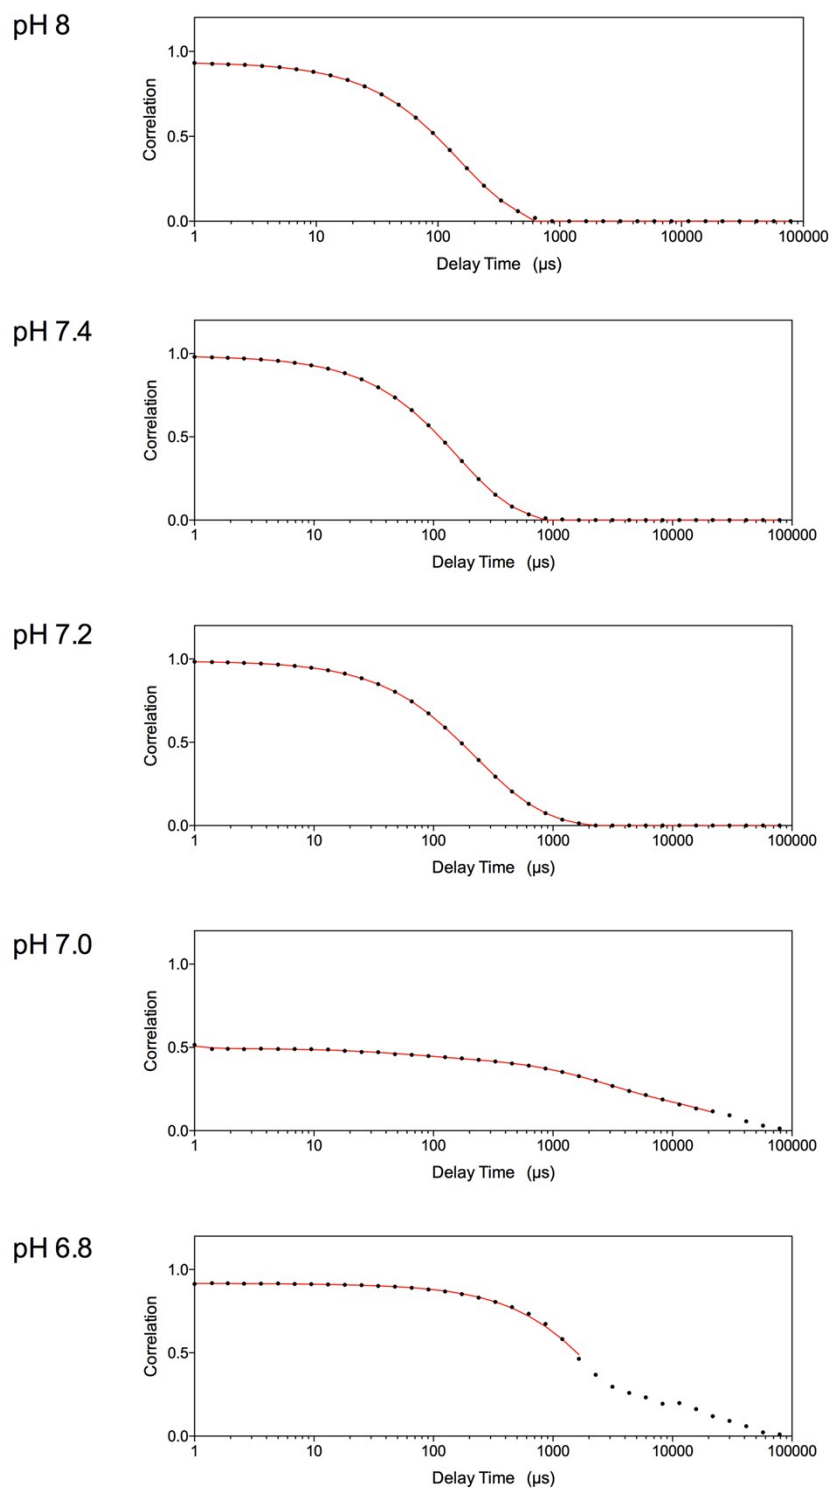

**Figure S9.** pH-dependent disassembly of nanoparticles analysis by DLS. Correlation function (black circles) and fitting function (red line) for PEGMA<sub>8</sub> NPs adjusted to selected pH values at 37°C.

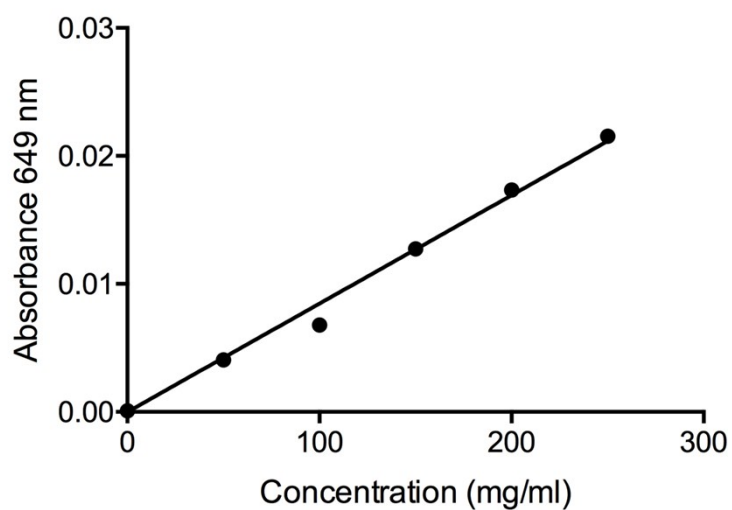

**Figure S10.** Cy5-labelled PDEAEMA standard curve.

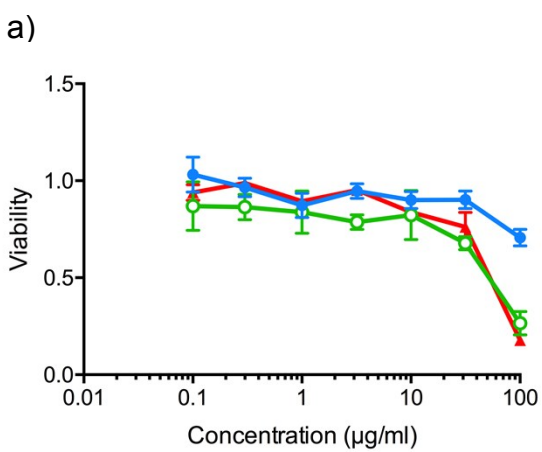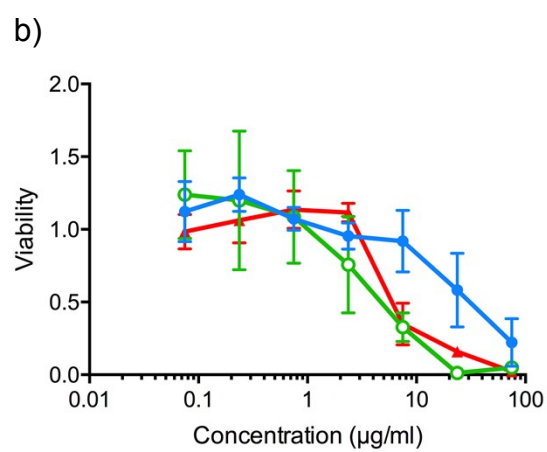



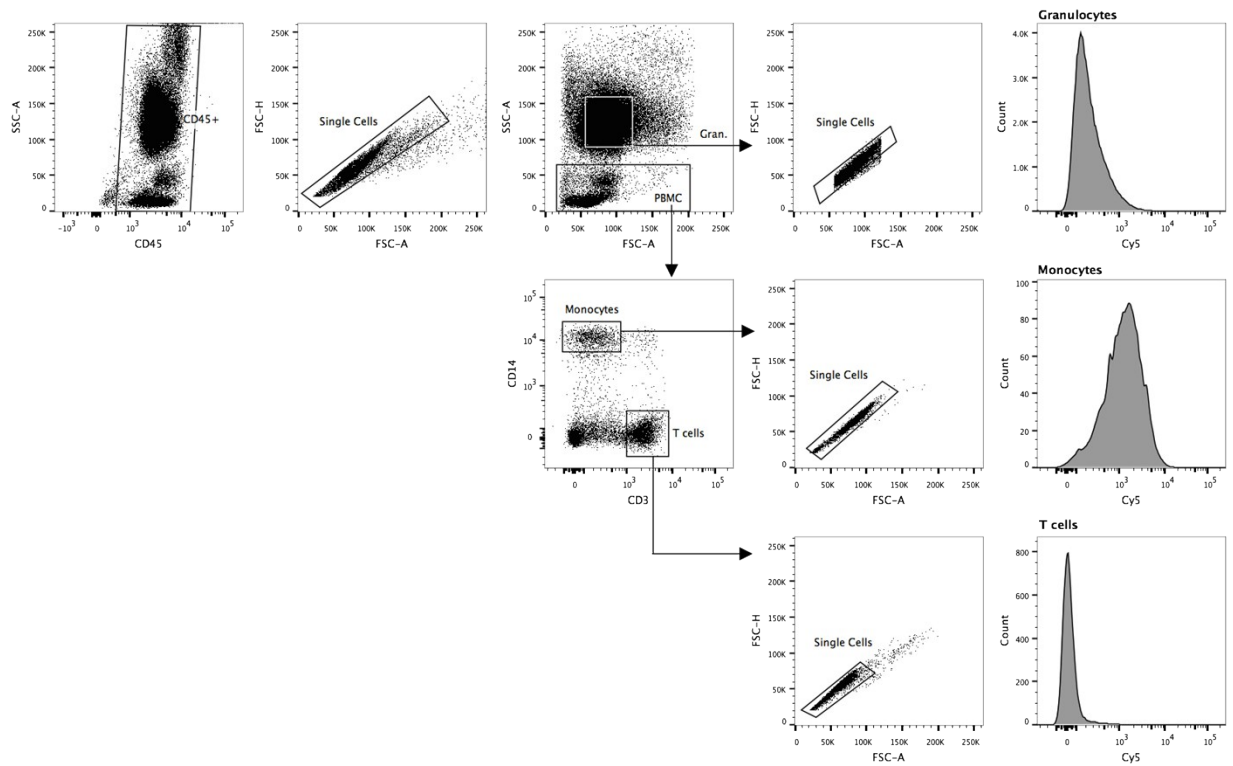

**Figure S12.** Gating strategy for identification of monocyte, granulocyte and T cell association with nanoparticles. Representative flow cytometry plots from a single donor after association with PEGMA<sub>8</sub>. Leukocytes are identified as CD45<sup>+</sup> before selecting single cells, Granulocytes and peripheral blood mononuclear cells (PBMC) identified by forward (FSC) and side scatter (SSC) properties. PBMC are identified as monocytes (CD14<sup>+</sup> CD3<sup>-</sup>) and T cells (CD3<sup>+</sup> CD14<sup>-</sup>). After again gating on single cells, Cy5 signals were analyzed to identify nanoparticle association.

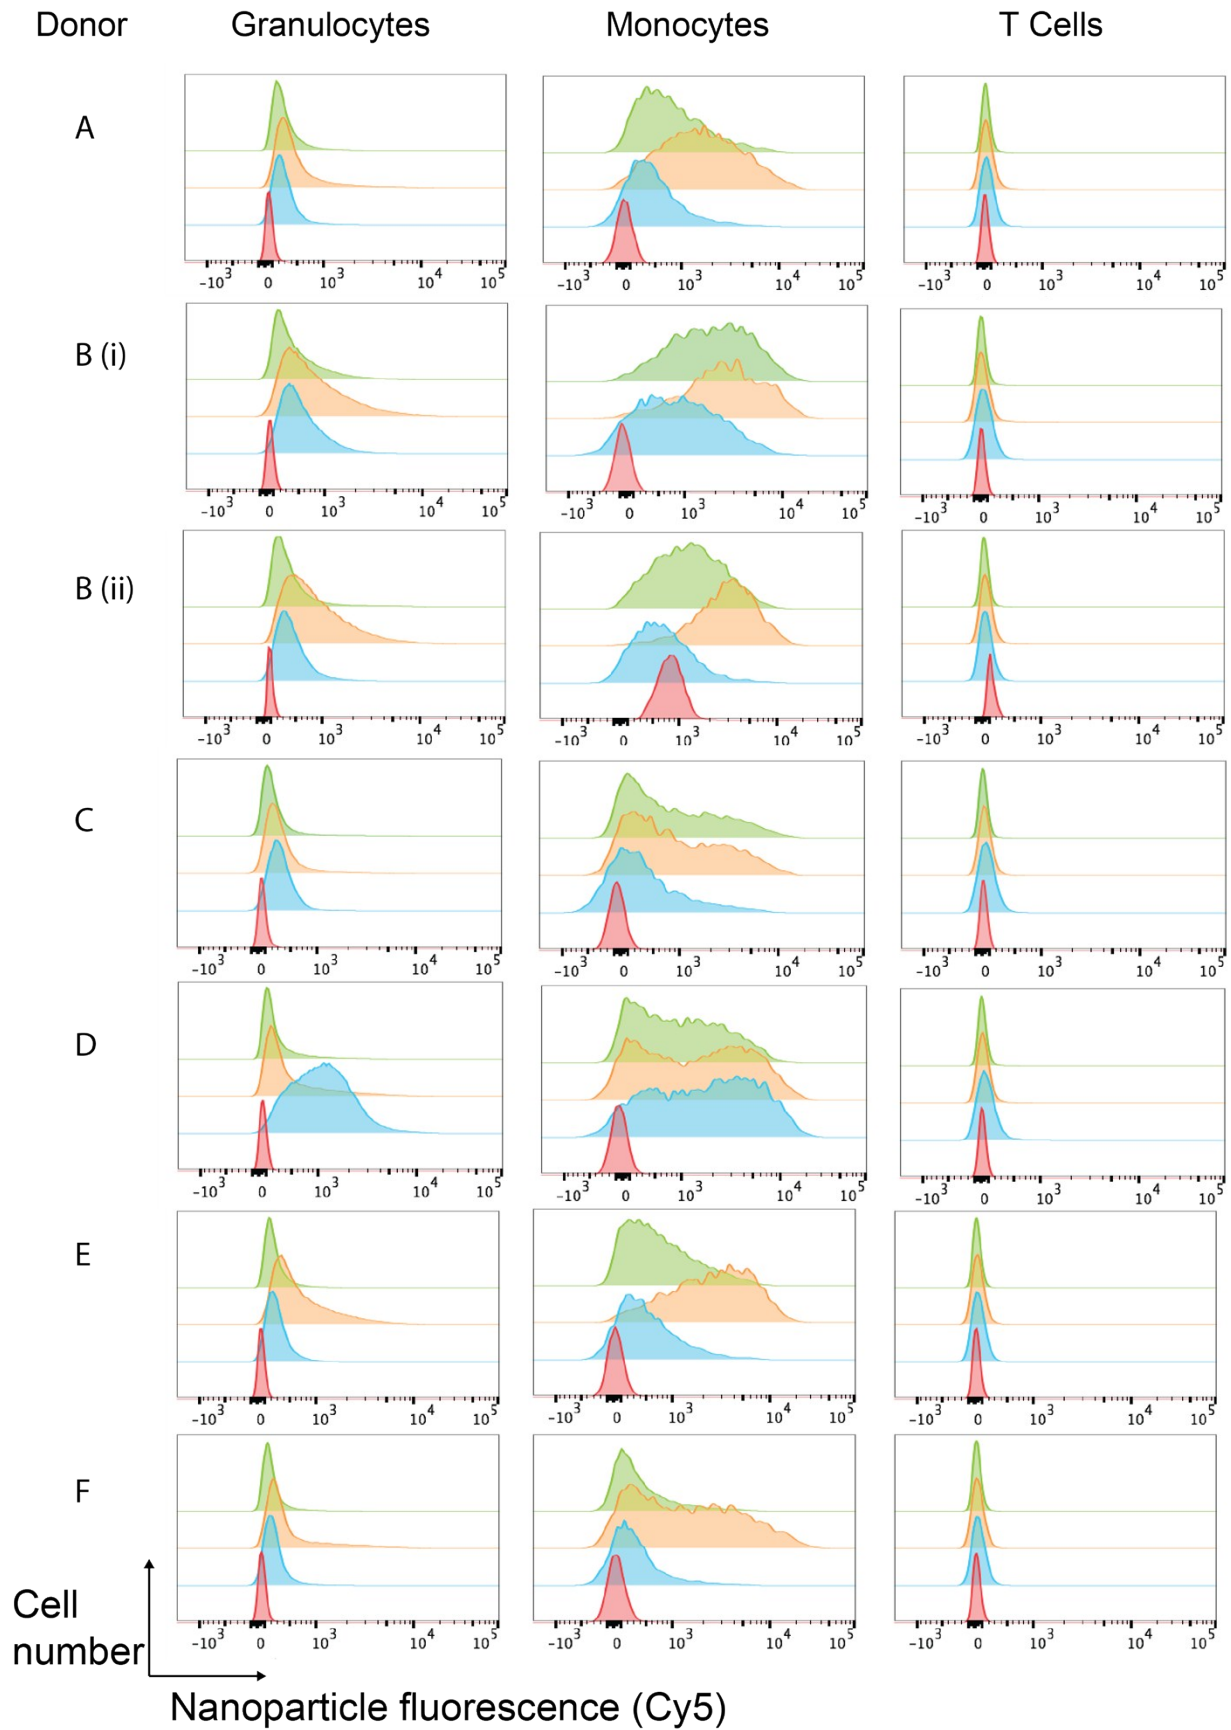

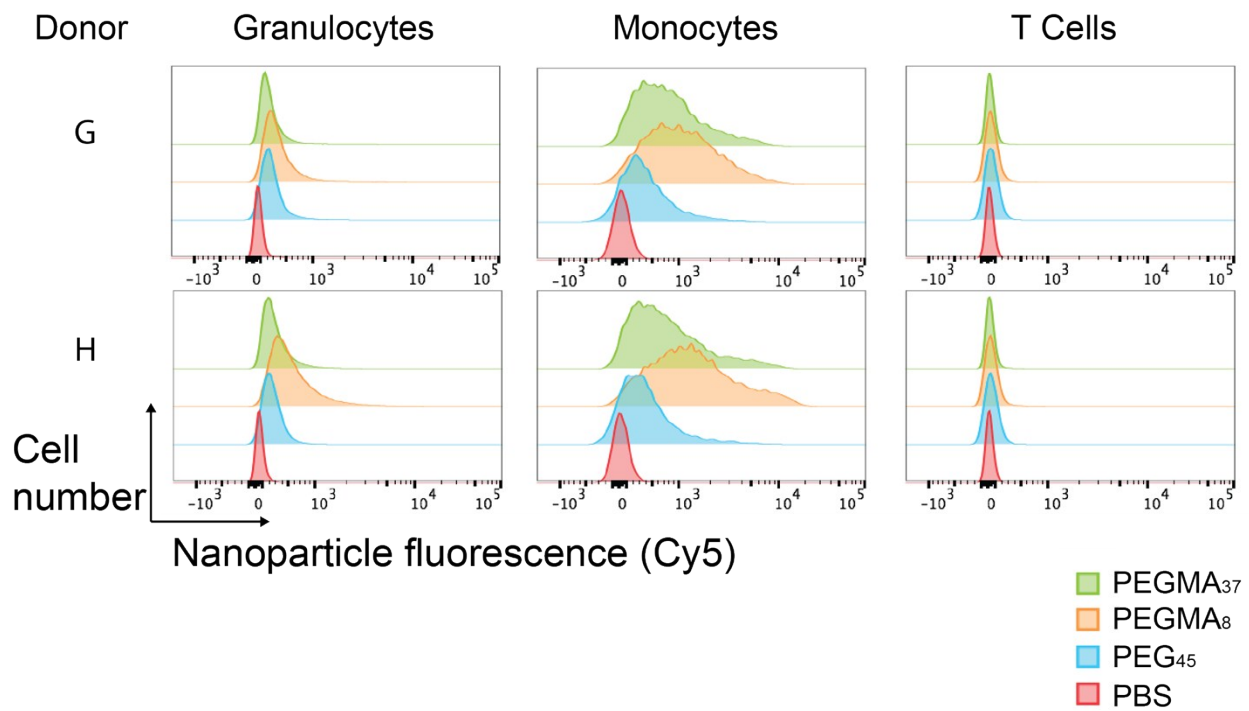

**Figure S13.** Flow cytometry histograms for monocyte, granulocyte and T-cell association of nanoparticles in 8 donors. The fluorescence was normalized to account for the different concentration of fluorescent labeling of the particles.
